# Supplementary material for: Facile multi-decagram synthesis of methyl but-2-ynoate
Source: Royal Society of Chemistry journal article supplement (doi:10.1039/c3qo00072a), 2014-01-01
Supplement: c3qo00072a.pdf [file c3qo00072a.pdf]

## Supporting information: Facile multi-decagram synthesis of methyl but-2-ynoate

Benjamin Darses, Iacovos N. Michaelides and Darren J. Dixon

Department of Chemistry, Chemistry Research Laboratory,  
University of Oxford, Mansfield Road, Oxford, OX1 3TA,

[darren.dixon@chem.ox.ac.uk](mailto:darren.dixon@chem.ox.ac.uk)

### Procedure:

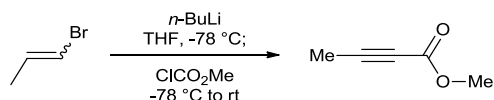

An oven-dried 3-L round-bottomed flask equipped with a magnetic stirring bar, a rubber septum, an electronic thermometer and flushed with nitrogen was charged with (*Z/E*)-1-bromo-1-propene (81.5 mL, 952 mmol) (Note 1), 1 L of anhydrous tetrahydrofuran (THF) (Note 2) and maintained under a nitrogen atmosphere. The flask was cooled to  $-78\text{ }^\circ\text{C}$  with a dry ice-acetone bath, and after 10 minutes *n*-butyllithium 2.5M (800 mL, 2.00 mol) (Note 3) was added slowly to maintain the internal temperature below  $-60\text{ }^\circ\text{C}$ . Following the end of the addition, the off-white mixture was stirred for 1.5 hours at  $-78\text{ }^\circ\text{C}$  before methyl chloroformate (96.0 mL, 1.24 mol) (Note 4) was added dropwise over 40 minutes in order to maintain the internal temperature between  $-70\text{ }^\circ\text{C}$  and  $-60\text{ }^\circ\text{C}$ . The mixture was stirred for 2 hours at  $-78\text{ }^\circ\text{C}$  before the cooling bath was removed allowing the mixture to warm to room temperature over 1.5 hours. 500 mL of water were subsequently added and the organic layer was decanted. The aqueous fraction was extracted twice with 400 mL of diethyl ether and the combined organic fractions were dried over anhydrous sodium sulfate, filtered, and the filtrate was concentrated under reduced pressure ( $40\text{ }^\circ\text{C}$ , 100 mbar) (Note 5) to afford an orange brown liquid (Note 6). After distillation through a 5 cm long vigreux column (Bp =  $64\text{--}67\text{ }^\circ\text{C}$ , 60 mbar) (Note 7) methyl but-2-ynoate (74.7g, 80%) (Note 8) was obtained as a colourless oil (Note 9).

### Notes

1. 1-Bromo-1-propene (*cis* and *trans*, 98%) (CAS 590-14-7) was purchased from Sigma-Aldrich Chemical Company, Inc. (Cat. No. B78203) and used as received.
2. Anhydrous tetrahydrofuran was obtained by filtration through activated alumina (powder ~150 mesh, pore size  $58\text{ \AA}$ , basic, Sigma-Aldrich) columns.
3. *n*-Butyllithium 2.5M solution in hexanes, AcroSeal was purchased from Acros Organics and used as received.
4. Methyl chloroformate (99%) was purchased from Sigma-Aldrich Chemical Company, Inc. and used as received.
5. Employing these conditions for concentrating *in vacuo* minimized product loss on the rotary evaporator.
6. Depending on the scale, the colour of the crude product may change from pale yellow to brown; however, this has no significant effect on the yield.
7. Towards the end of the distillation, the residue was transferred to a smaller flask and the distillation was continued to recover the maximum amount of product.
8. Similar results were obtained starting with 40 mL and 10 mL of 1-bromo-1-propene: methyl but-2-ynoate was afforded in 84% and 77% yields respectively.
9. The product is stable at  $-20\text{ }^\circ\text{C}$  for at least three months.

The elemental analysis and the spectral analysis of the product are as follows: Anal. Calcd for  $C_5H_6O_2$ : C, 61.22; H, 6.16. Found: C, 61.12; H, 6.00%.  $^1H$  NMR ( $CDCl_3$ , 500 MHz)  $\delta_H$  3.76 (s, 3H,  $CH_3-O$ ), 1.99 (s, 3H,  $CH_3-C\equiv$ ).  $^{13}C$  NMR ( $CDCl_3$ , 125 MHz)  $\delta_C$  154.2 (C- $\underline{C}O_2Me$ ), 85.7 ( $CH_3-\underline{C}\equiv$ ), 72.1 ( $C\equiv\underline{C}-CO_2Me$ ), 52.5 ( $\underline{C}H_3-O$ ), 3.7 ( $\underline{C}H_3-C\equiv$ ). IR (film)/ $cm^{-1}$   $\nu_{max}$  2957, 2247, 1714, 1436, 1263, 1075.

$^1\text{H}$ ,  $^{13}\text{C}$  NMR and elemental analysis of *methyl but-2-ynoate*:

$^1\text{H}$  NMR ( $\text{CDCl}_3$ , 500 MHz)

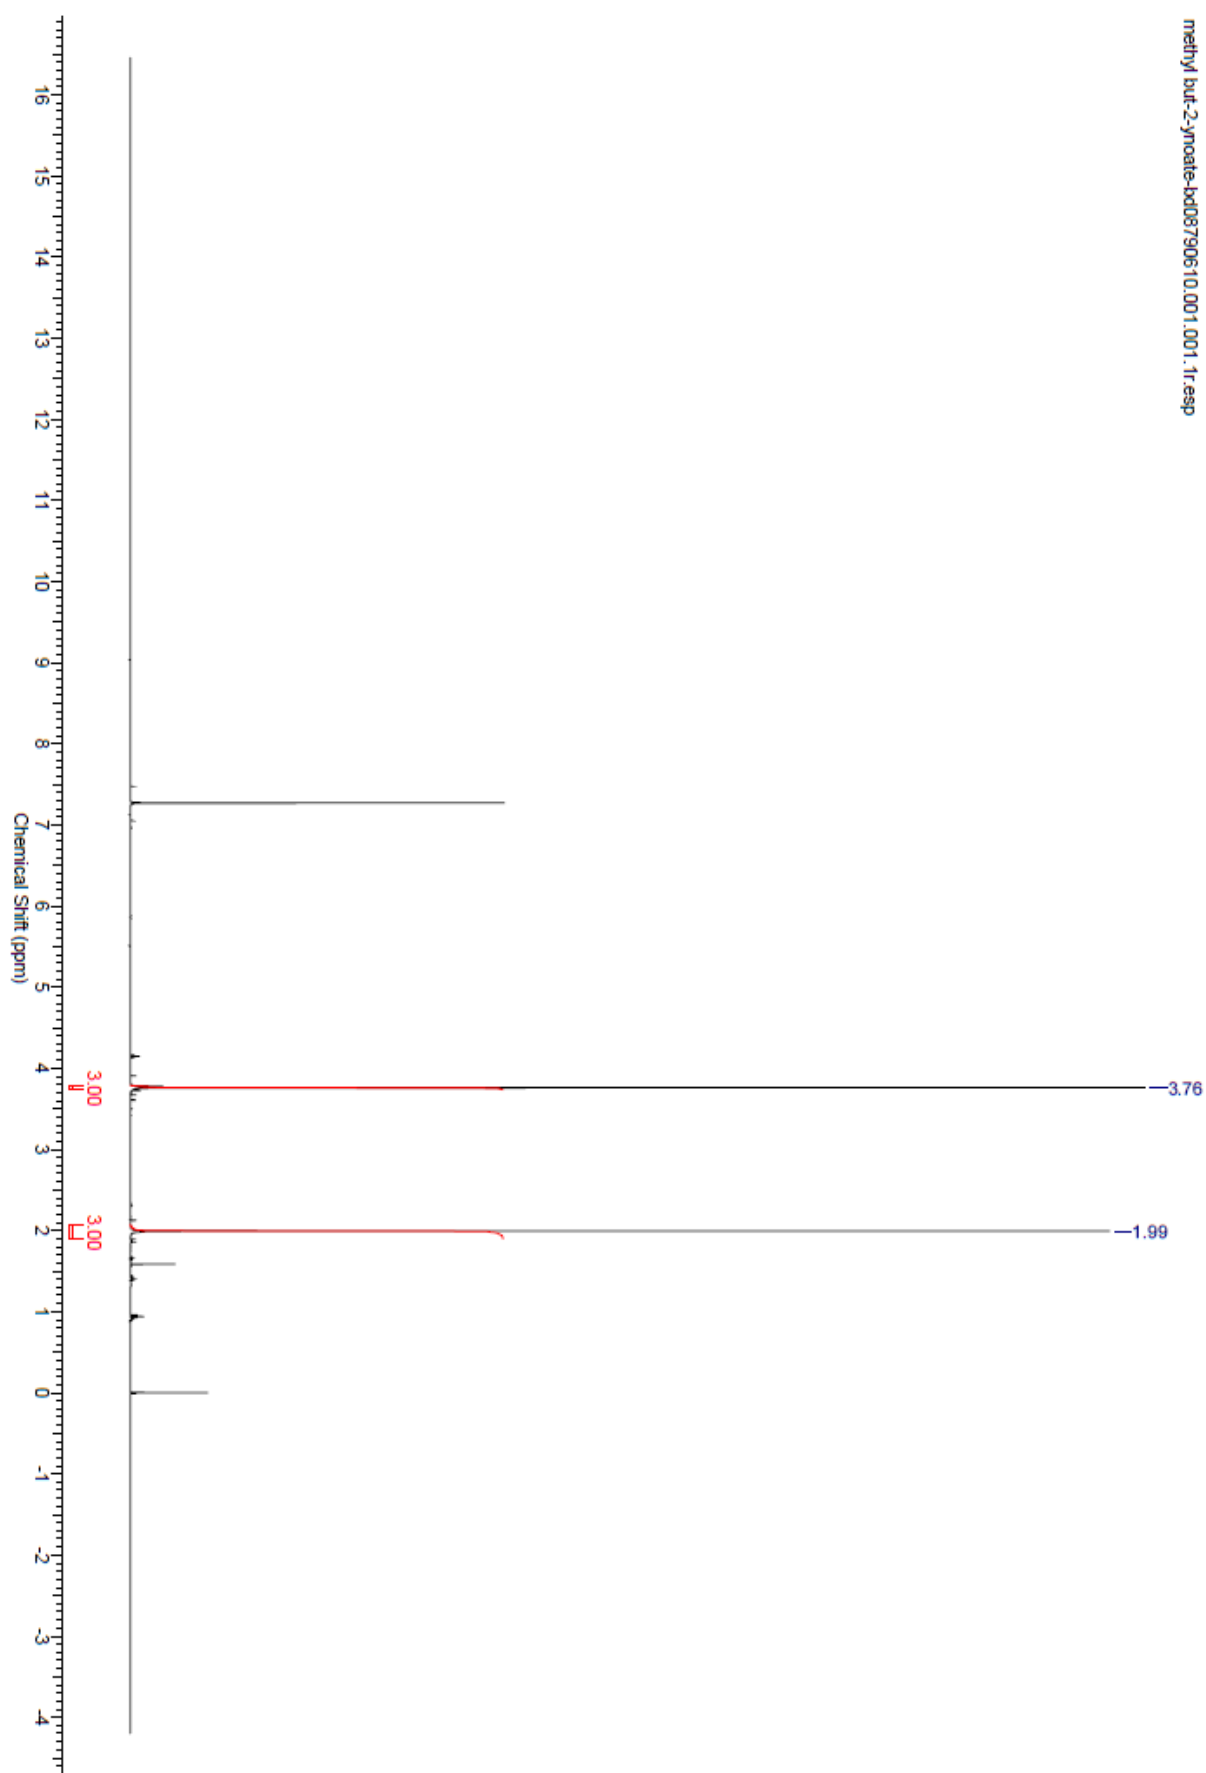

$^{13}\text{C}$  NMR ( $\text{CDCl}_3$ , 125 MHz)

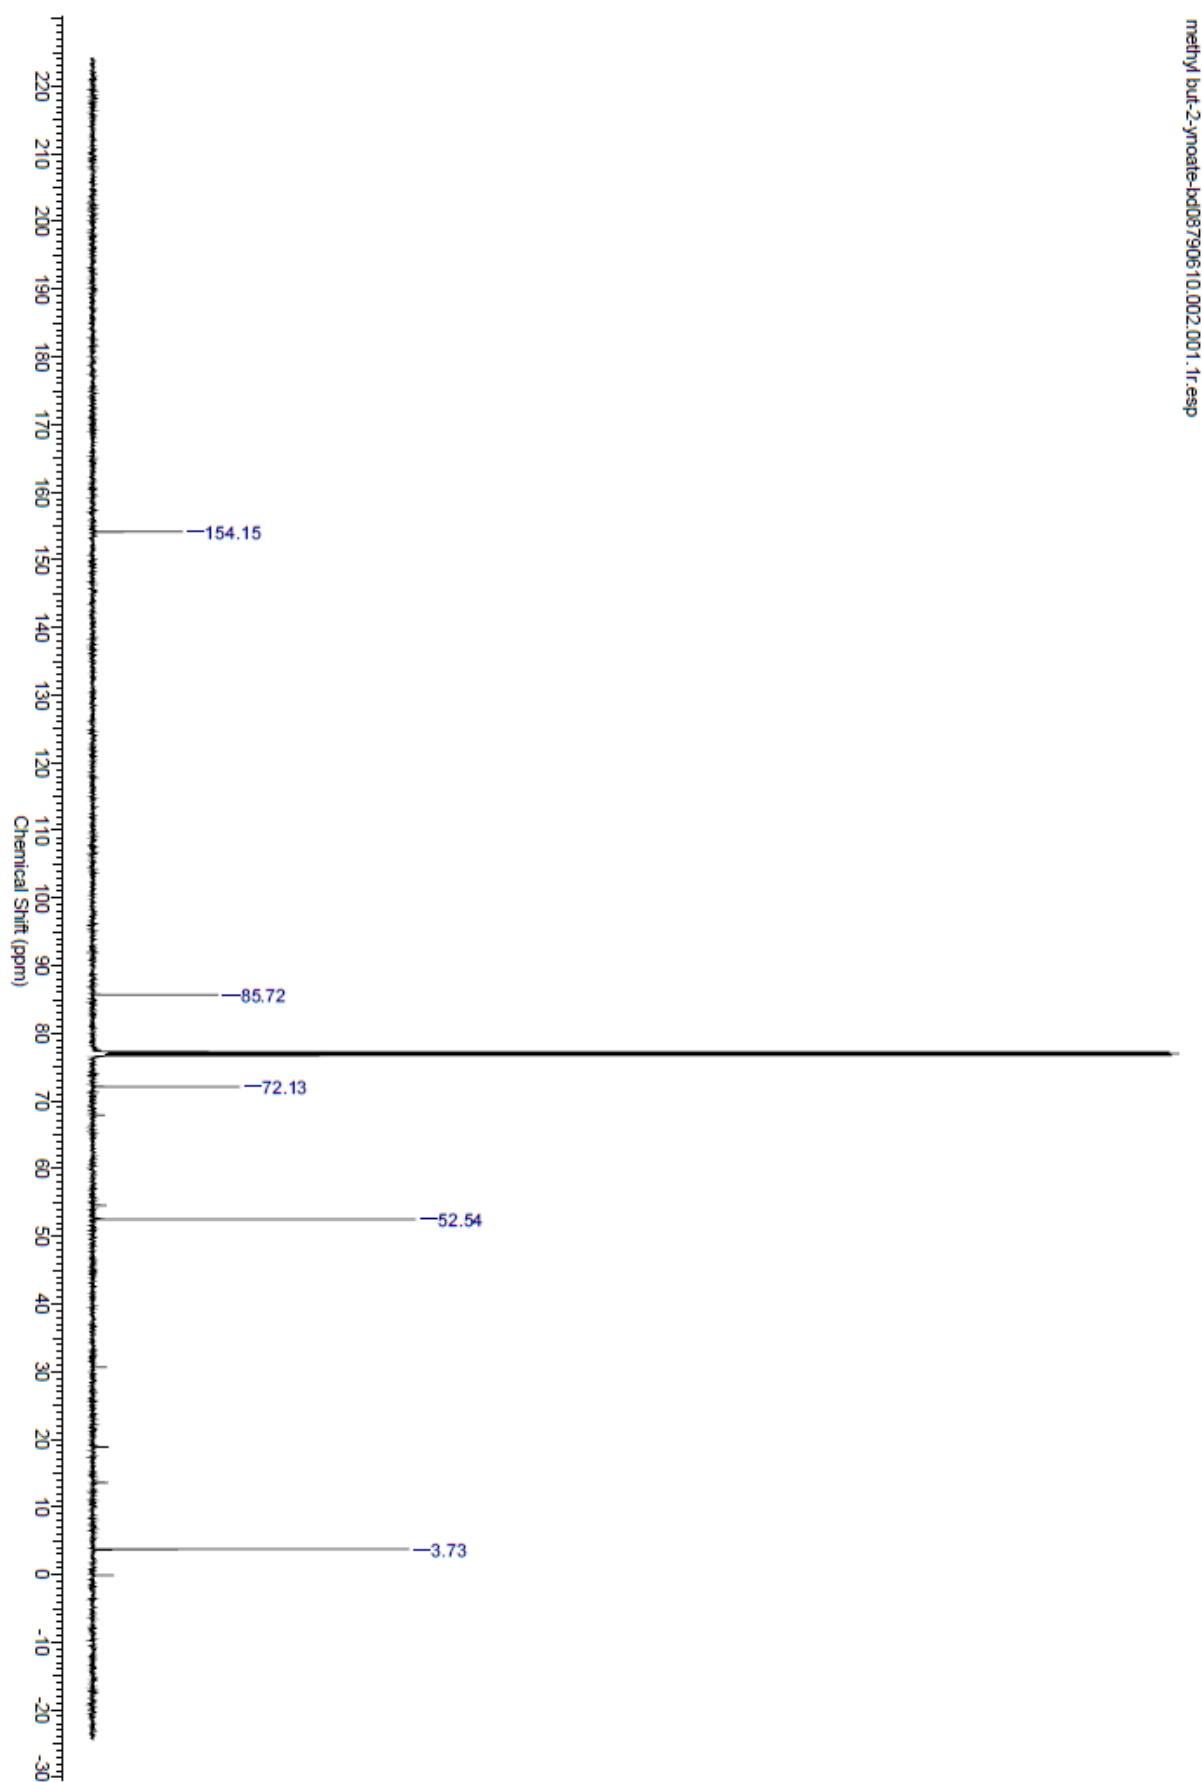

## Elemental analysis

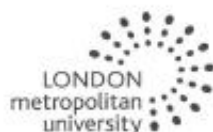

### Elemental Analysis Service

Please send completed form and samples to:

Stephen Boyer  
School of Human Sciences  
Science Centre  
London Metropolitan University  
29 Homsey Road  
London N7 7DD  
Telephone: 020 7133 3605  
Fax: 020 7133 2577  
Email: [s.boyer@londonmet.ac.uk](mailto:s.boyer@londonmet.ac.uk)

|                                                                                                                                       |
|---------------------------------------------------------------------------------------------------------------------------------------|
| Sample submitted by: Iacovos Neal Michaelides                                                                                         |
| Address: Department of Chemistry, Chemistry Research Laboratory, University of Oxford, Mansfield Road, Oxford, OX1 3TA, UK            |
| Telephone: 01865-2-75665      Email: <a href="mailto:iacovos.michaelides@st-hughs.ox.ac.uk">iacovos.michaelides@st-hughs.ox.ac.uk</a> |
| Date Submitted: 12-01-11                                                                                                              |

Please submit ca. 5 mg of sample.

|                                                 |
|-------------------------------------------------|
| Sample Reference No.: IAMI-BEDA-036H.1          |
| Name of Compound: <b>METHYL BUT-2-YNOATE</b>    |
| Molecular Formula: $C_5H_8O_2$                  |
| Stability: Unknown, keep in dry place           |
| Hazards: XN= Harmful; R: 10, 20/21/22, 36/37/38 |
| Other Remarks: Malodorous                       |

| Element  | Expected % | Found (1) | Found (2) |  |
|----------|------------|-----------|-----------|--|
| Carbon   | 61.22      | 61.13     | 61.12     |  |
| Hydrogen | 6.16       | 6.00      | 6.00      |  |
| Nitrogen | N/A        | -         | -         |  |

Authorising Signature: 

|                        |                                                                                                |
|------------------------|------------------------------------------------------------------------------------------------|
| Date Completed: 130111 | Signature:  |
| Comments:              |                                                                                                |
